# Supplementary material for: A novel nanodrug for the sensitization of photothermal chemotherapy for breast cancer in vitro
Source: Royal Society of Chemistry journal article supplement (doi:10.1039/d4ra01611d), 2024-01-01
Supplement: d4ra01611d1.pdf [file d4ra01611d1.pdf]

## Supplementary Information

### A Novel Nanodrug for Sensitization of Photothermal Chemotherapy of Breast Cancer in Vitro.

Ji chuan Kong <sup>1,\*</sup>, Feng Zhou <sup>1</sup>, Liting Shi <sup>1</sup>, Yihui Wei <sup>1</sup>, Chunhong Wu <sup>1,\*</sup>

School of Medicine, Henan Polytechnic University, 454000, Jiaozuo, PR China; [kongjichuan@hpu.edu.cn](mailto:kongjichuan@hpu.edu.cn)(J.K.); [Wu chunhong@hpu.edu.com](mailto:Wu chunhong@hpu.edu.com)

Table s1, The influence of stabilizer concentration and ultrasound time on DOX encapsulation efficiency.

| Concentration of PVA | Ultrasound time | Encapsulation efficiency(DOX) |
|----------------------|-----------------|-------------------------------|
| 0.5%                 | 30s             | 91.4%                         |
| 1%                   | 30s             | 82.7%                         |
| 1%                   | 3min            | 77.4%                         |
| 2%                   | 30s             | 85.9%                         |
| 2%                   | 3min            | 70.2%                         |

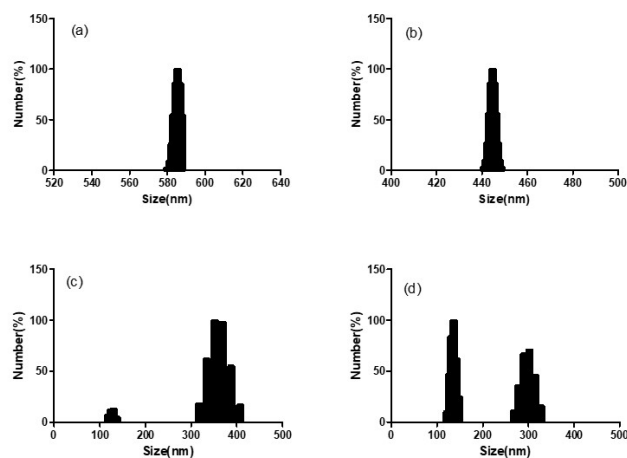

**Figure 1.** Size distribution of PLA @DOX /GA / ICG nano-particles (a) 0.5%PVA, ultrasonic dispersion for 30s;(b)1%PVA, ultrasonic dispersion for 30s;(c) 1%PVA,

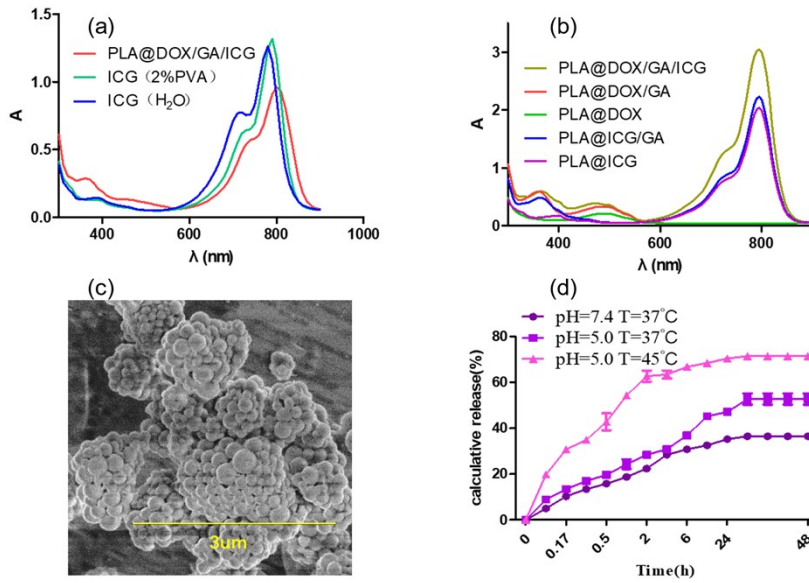

**Figure 2.** (a)(b) UV-vis absorption spectrum of medicine and nanoparticles;(c) SEM image of PLA@DOX/GA/ICG nanoparticles; (d) DOX release properties of nanodrugs.

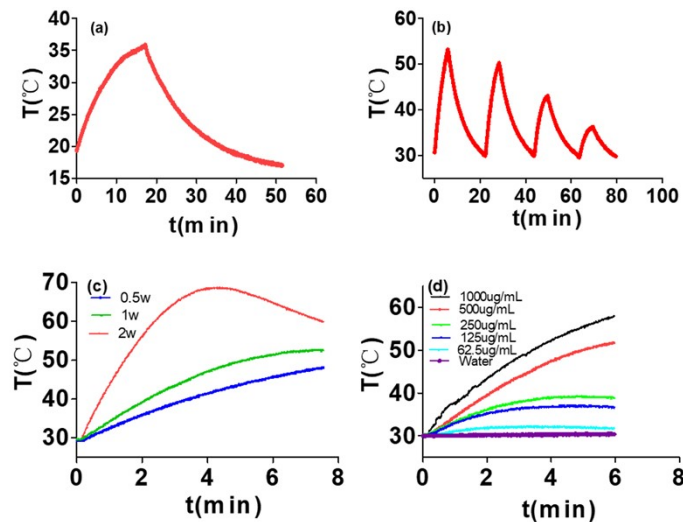

**Figure 3.** Photothermal performance of PLA@DOX /GA/ICG; (a), (b) Real-time temperature measurement of PLA@DOX/GA/ICG suspensions (500 μg/mL, PLA@ DOX / GA/ICG 1mL) under cycle laser irradiation (1w/cm<sup>2</sup>) for four cycles. Each cycle consisted of 5min irradiation followed by a cooling phase; (c) Temperature elevation curves of PLA@DOX/GA/ICG suspensions at a concentration of 500 μg/mL, exposed to an 808nm laser at various power densities;(d) Temperature elevation curves of PLA@DOX/GA/ICG suspensions at various

concentration exposed to  $1\text{w}/\text{cm}^2$ .

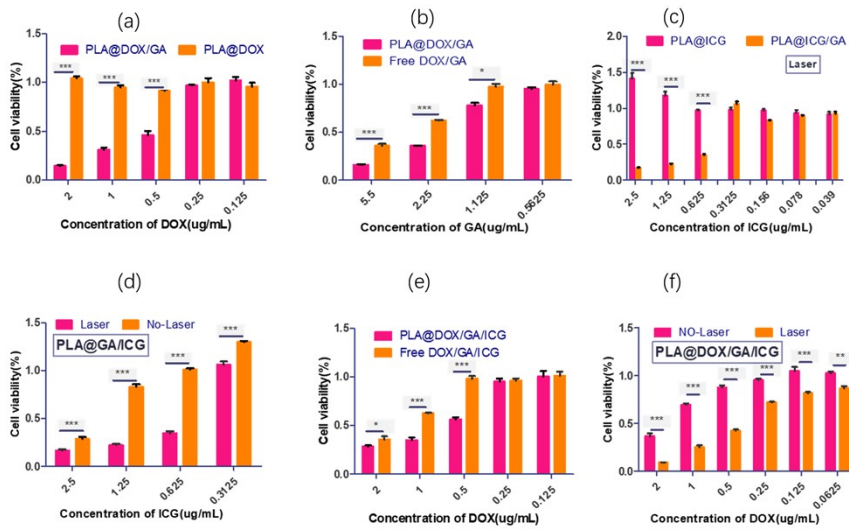

**Figure 4.** Viability of 4T1 cells incubated with the nanoparticles or free DOX/GA/ICG at different concentrations with and without NIR irradiation at  $1\text{w}/\text{cm}^2$ . Data are mean  $\pm$  SD ( $n = 5$ , \*  $p < 0.05$ , \*\*  $p < 0.01$ , \*\*\*  $p < 0.001$ )

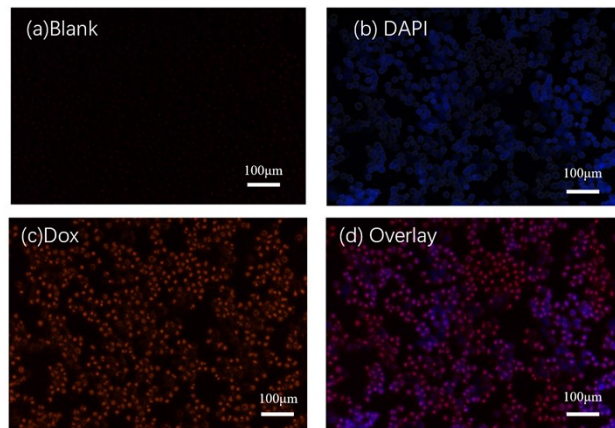

**Figure 5.** Inverted fluorescence microscopy images of 4 T1 cells after the treatment with PLA@DOX/GA/ICG and DAPI. (a) Blank; (b) DAPI channel; (c)Dox channel;(d) Overlay.

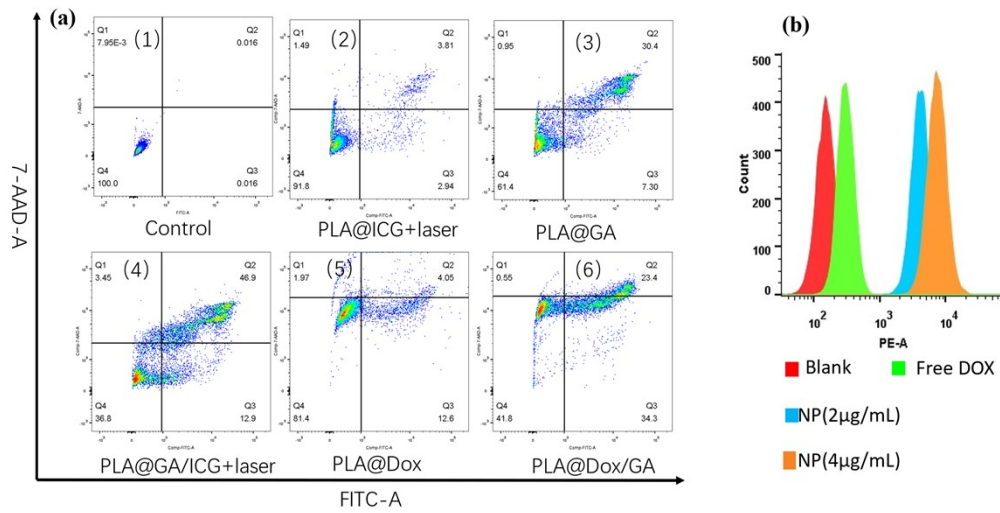

**Figure 6. (a)** Flow cytometry analysis of 4T1 cell apoptosis induced by different nanoparticles with or without irradiation through Annexin V-FITC/7-AAD staining. (1)Control group; (2)PLA@ICG+Laser; (3)PLA@GA; (4)PLA@GA/ICG+Laser; (5)PLA@DOX; (6)PLA@DOX/GA. Bottom right quadrant: early apoptosis; top right quadrant: late apoptosis. **(b)** Flow cytometry for the investigation of cellular uptake to PLA@DOX/GA/ICG

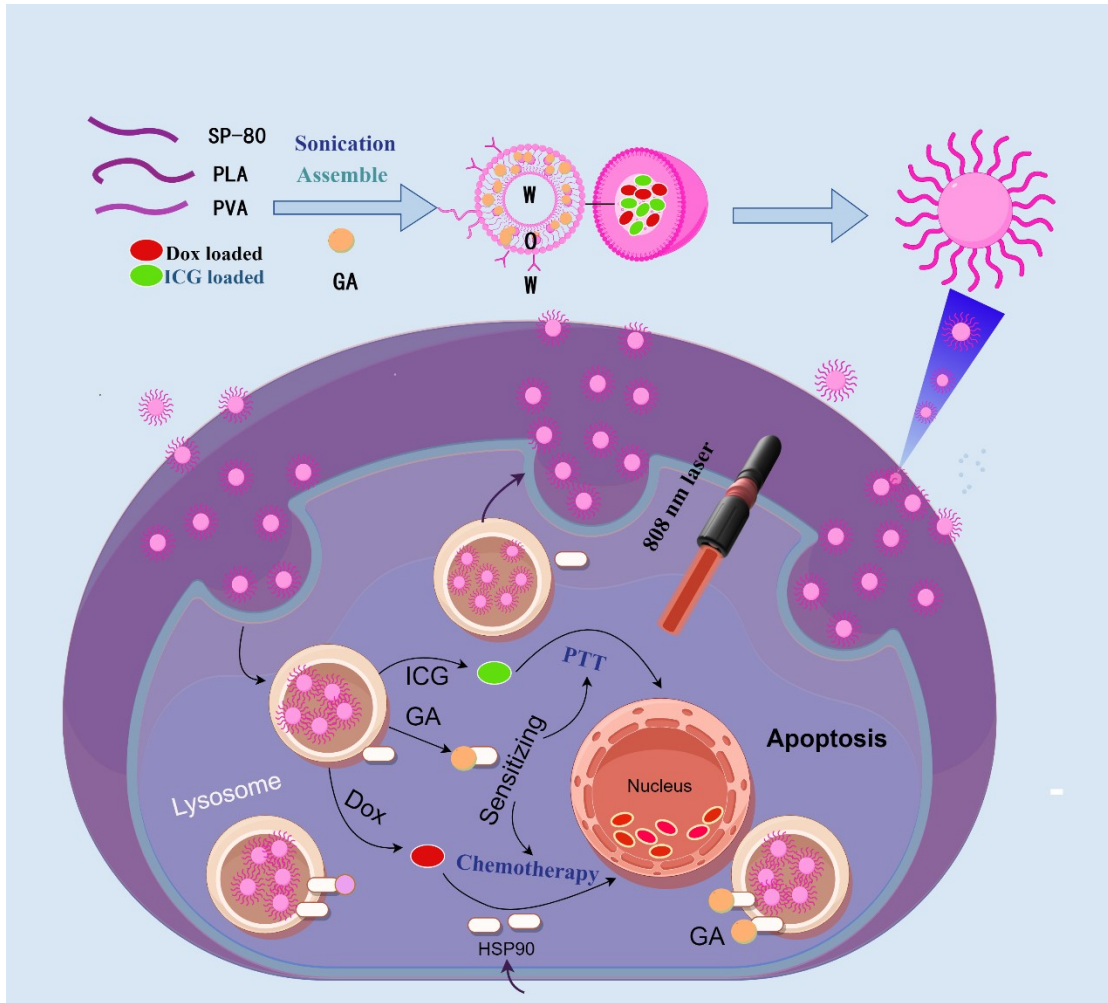

**Scheme 1.** Schematic illustration of preparation of PLA@GA /DOX/ICG and action diagram to cancer cell. (By Figdraw)
